# Supplementary material for: Knowledge and attitudes of UK university students in relation to ultraviolet radiation (UVR) exposure and their sun-related behaviours: a qualitative study
Source: PubMed Central journal article supplement — BMJ Open. 2017 Mar 10;7(3):e014388. doi: 10.1136/bmjopen-2016-014388 (PMC5353347; doi:10.1136/bmjopen-2016-014388), 2017-03-10
Supplement: bmjopen-2016-014388supp.pdf [file bmjopen-2016-014388supp.pdf]

## Eligibility Questionnaire

- The information you provide from this questionnaire will be used to evaluate your eligibility for the study and to ensure I have an equal spread of selected participants based on gender and tanning behaviours and the type of degree being studied.
- There are 12 questions in this questionnaire.
- If you would not like to answer any of the following questions, you do not have to, nor need to state why.
- Any information on this questionnaire will be kept confidential and only accessible to myself (the researcher) and my Supervisor (a staff member and researcher at the University of Birmingham).
- Once you have finished the questionnaire please send it back to [insert email address]
- **If you have any questions regarding the questionnaire, please also contact [insert telephone number] or [insert email address]**

***Please write your answer for Questions 1-4***

1. Name.....
2. Age.....
3. Gender .....
4. Degree/Course being studied.....

***Please tick the appropriate box for Questions 5-12***

5. Are you a student at the University of Birmingham

Yes

No

6. Are you an international student?

Yes

No

7. Are you a student on your year abroad at the University of Birmingham?

Yes

No

8. What is your ethnic group?

White

- English/Welsh/Scottish/Northern Irish
- Irish
- Any other White Background, and please state .....

Mixed/multiple ethnic groups

- White and Black Caribbean
- White and Black African
- White and Asian
- Any other Mixed/multiple ethnic background, and please state .....

Asian/Asian British

- Indian
- Pakistani
- Chinese
- Any other Asian background, and please state .....

Black/African/Caribbean/Black British

- African
- Caribbean
- Any other Mixed/multiple ethnic background, and please state .....

Other ethnic group

- Arab
- Any other ethnic background, and please state .....

9. Do you like to have a tan?

Yes

No

No preference

10. When you are in the sun, do you:

Try to tan as much as possible

Like to tan but also use sun-protection

Try to protect yourself as much as possible

Other and please state.....

11. Do you use sunbeds?

Yes

No, but I have in the past

No, I do not use sunbeds and never have used one

***If you answered 'Yes' or 'No, but I have in the past' in question 11, please answer 11.b)***

***If you answered 'No, I do not use sunbeds and never have used one', please continue onto question 12.***

11.b) How often did you/ do you use sunbeds?

More than once per week

Weekly

Monthly

A few times a year

12. Apart from sunbeds and sunbathing, do you use other methods to tan?

Yes, please state.....

No

**End of Questions**

Thank you for taking the time to complete this questionnaire.

Please return to [insert email address]
